# Supplementary material
Source: Springer Nature journal article supplement (https://www.springermedizin.de/resource/supplementary/12936_2012_2124_MOESM2_ESM.pdf/9542750)

- ◆ negative control
- wild type plasmid
- ▲ *kdr-w* plasmid

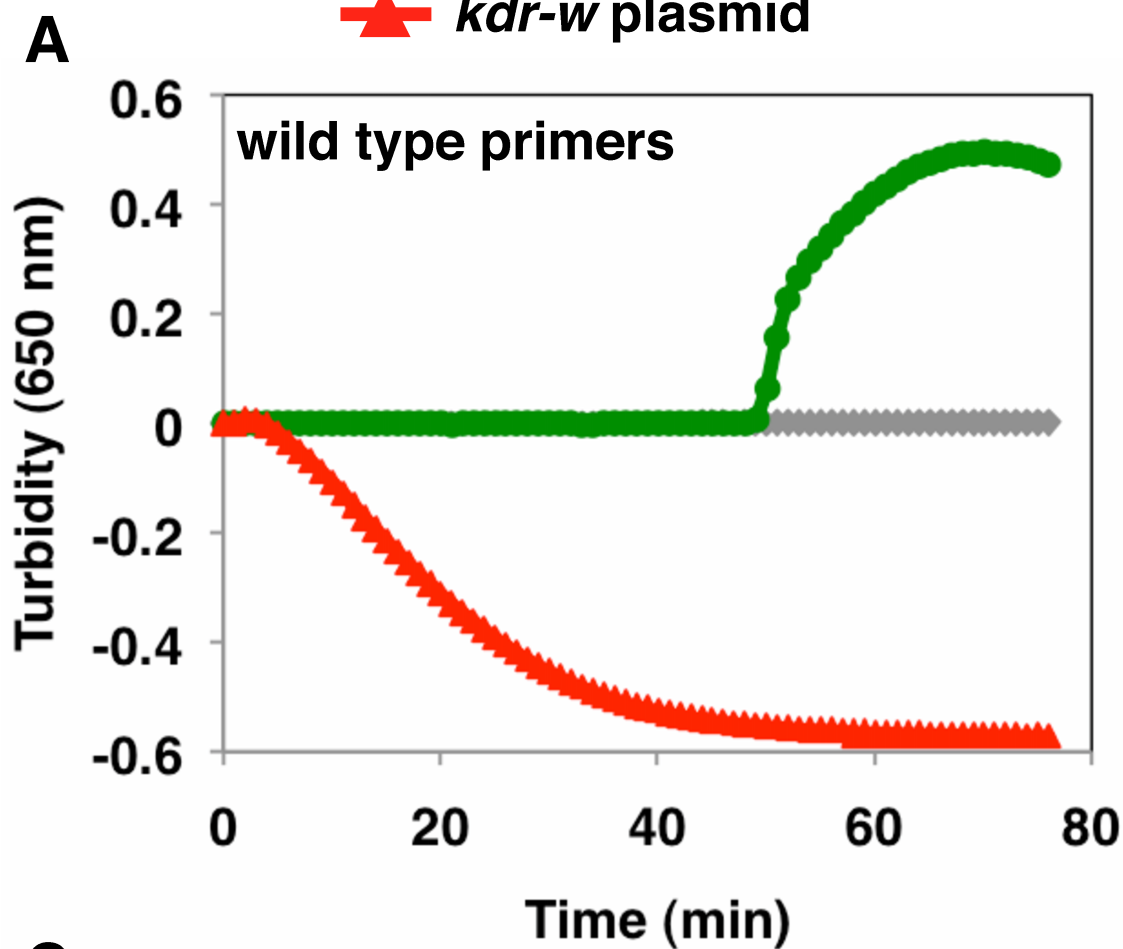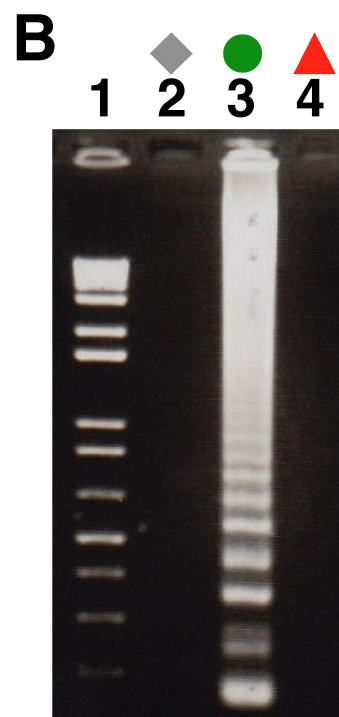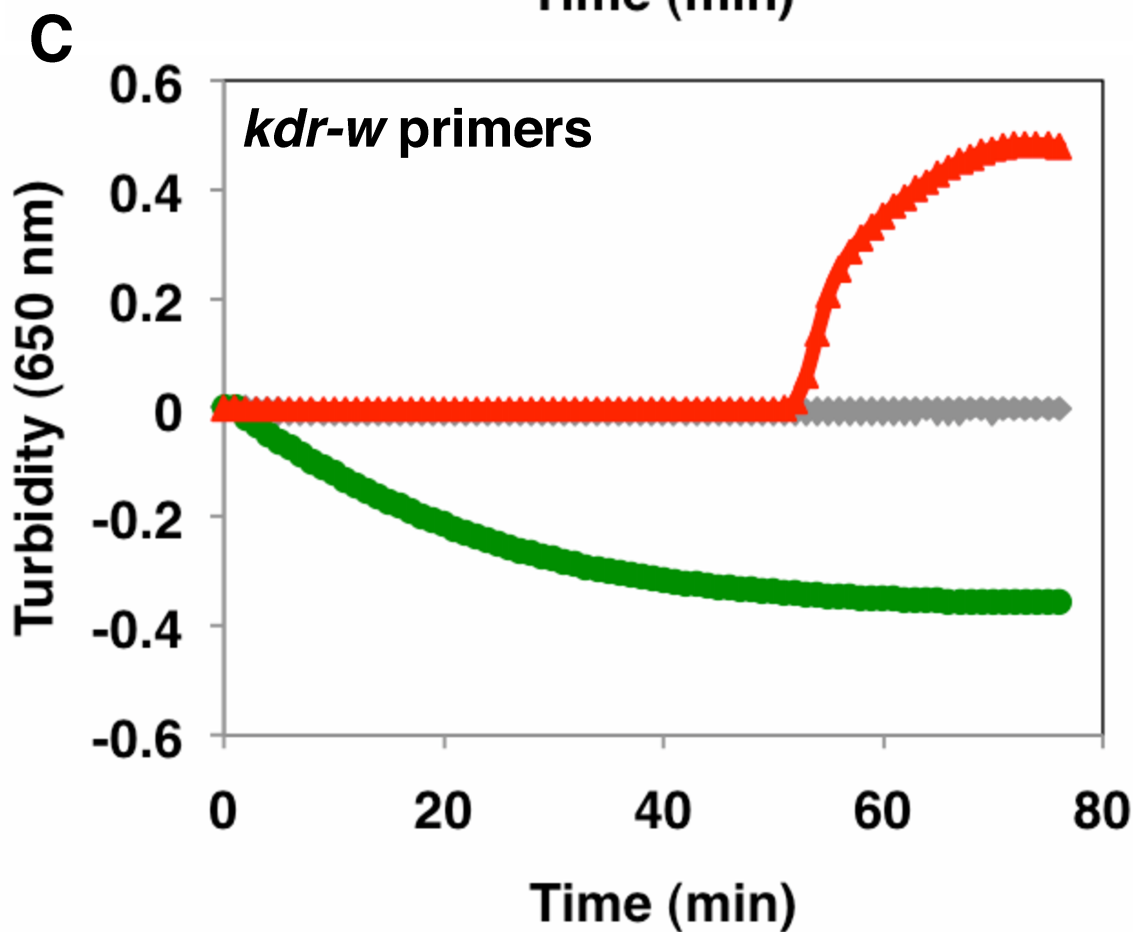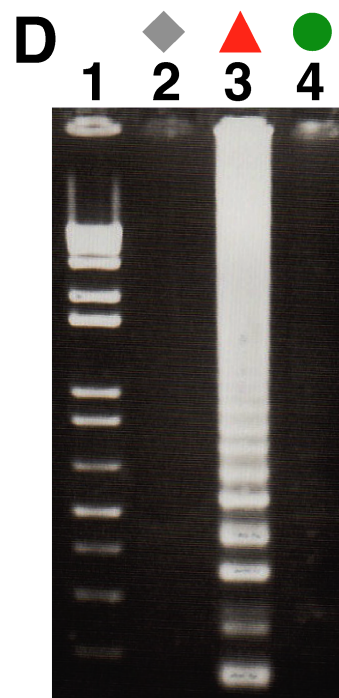

Supplement: MOESM2 [file 9542750]
